# Supplementary material for: Ice Sheet Model Intercomparison Project (ISMIP6) contribution to CMIP6
Source: Copernicus journal article supplement (doi:10.5194/gmd-2016-105), 2016-05-26
Supplement: Supplementary file [file gmd-2016-105-AC1-supplement.pdf]

**Author's response to comments from G. Durand (Comment 1)**

**I enjoyed reading this manuscript clearly describing ISMIP6 initiative. I would however suggest to add a table similar to table 2. I think, it would be appropriate to list the ice sheet models with the corresponding research groups who expressed an interest in participating in this MIP**

Thank you very much for having read the manuscript and for your suggestion. We have now added a table similar to table 2, which lists the ice sheet models and the corresponding research groups.
